# Supplementary material for: Target-induced structure switching of a hairpin aptamer for the fluorescence detection of zeatin
Source: Royal Society of Chemistry journal article supplement (doi:10.1039/c6ay01679k), 2016-01-01
Supplement: c6ay01679k1.pdf [file c6ay01679k1.pdf]

## Supporting Information

# Target-Induced Structure Switching of Hairpin Aptamer for Fluorescence Detection of Zeatin

Key Laboratory of Analytical Chemistry for Biology and Medicine (Ministry of Education), College of Chemistry and Molecular Sciences, Wuhan University, Wuhan 430072, P. R. China

\* Corresponding author

Tel: +86 27-68756557; fax: +86 27-68754067

E-mail addresses: zhkhe@whu.edu.cn (Z. He)

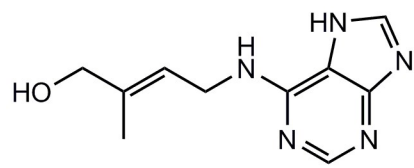

zeatin

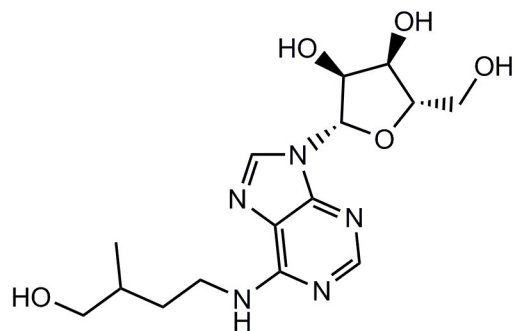

dihydrozeatinriboside

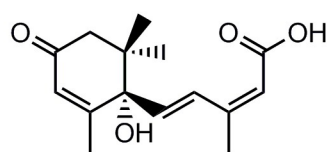

abscisic acid

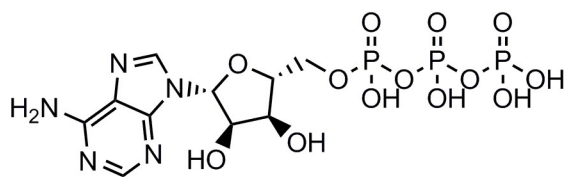

ATP

Fig. S1 The chemical structures of zeatin, dihydrozeatinriboside, abscisic acid and adenosine triphosphate.
